# Table of Contents

## EDITORIAL INTRODUCTION

|                                                                              |     |
|------------------------------------------------------------------------------|-----|
| <b>Focus: Issues in Developmental Biology Education</b><br>Jeff Hardin ..... | 1-2 |
|------------------------------------------------------------------------------|-----|

## FEATURES

### Special Focus Features

|                                                                                                                                                                       |       |
|-----------------------------------------------------------------------------------------------------------------------------------------------------------------------|-------|
| <i>Educator Highlight</i><br><b>Morris Maduro</b><br>Laura L. Mays Hoopes .....                                                                                       | 3-4   |
| <i>WWW.Life Sciences Education</i><br><b>Bringing Developmental Biology to Life on the Web</b><br>Louisa A. Stark .....                                               | 5-9   |
| <i>Points of View: What Are the Key Concepts in Developmental Biology?</i><br><b>Teaching Concepts Versus Facts in Developmental Biology</b><br>William B. Wood ..... | 10-11 |
| <b>All I Really Needed to Know I Learned during Gastrulation</b><br>Scott F. Gilbert .....                                                                            | 12-13 |
| <b>The Missing Dimension in Developmental Biology Education</b><br>Jeff Hardin .....                                                                                  | 13-16 |

### Other Features

|                                                                                                                                                                                        |       |
|----------------------------------------------------------------------------------------------------------------------------------------------------------------------------------------|-------|
| <i>Book Review</i><br><b>Brain Evolution: The Good, the Bad, and the Ugly</b><br>José Vázquez .....                                                                                    | 17-19 |
| <i>From the National Academies</i><br><b>Understanding Our Audiences: The Design and Evolution of Science, Evolution, and Creationism</b><br>Jay B. Labov and Barbara Kline Pope ..... | 20-24 |
| <i>Current Insights</i><br><b>Recent Research in Science Teaching and Learning</b><br>Erin Dolan .....                                                                                 | 25-26 |

## ESSAYS

### Special Focus Essays

|                                                                                                                                                                                                                                          |       |
|------------------------------------------------------------------------------------------------------------------------------------------------------------------------------------------------------------------------------------------|-------|
| <b>More than a Picture: Helping Undergraduates Learn to Communicate through Scientific Images</b><br>Fiona L. Watson and Barbara Lom .....                                                                                               | 27-35 |
| <b>“Do I Need to Know This for the Exam?” Using Popular Media, Inquiry-based Laboratories, and a Community of Scientific Practice to Motivate Students to Learn Developmental Biology</b><br>Marga Madhuri and Christine Broussard ..... | 36-44 |

### Other Essay

|                                                                                                                                                                                                                  |       |
|------------------------------------------------------------------------------------------------------------------------------------------------------------------------------------------------------------------|-------|
| <b>Bioengineering and Bioinformatics Summer Institutes: Meeting Modern Challenges in Undergraduate Summer Research</b><br>Peter J. Butler, Cheng Dong, Alan J. Snyder, A. Daniel Jones, and Erin D. Sheets ..... | 45-53 |
|------------------------------------------------------------------------------------------------------------------------------------------------------------------------------------------------------------------|-------|

## ARTICLES

### Special Focus Articles

|                                                                                                                                                                                           |       |
|-------------------------------------------------------------------------------------------------------------------------------------------------------------------------------------------|-------|
| <b>Information Fluency for Undergraduate Biology Majors: Applications of Inquiry-based Learning in a Developmental Biology Course</b><br>Kathleen M. Gehring and Deborah A. Eastman ..... | 54-63 |
| <b>Student Learning of Early Embryonic Development via the Utilization of Research Resources from the Nematode <i>Caenorhabditis elegans</i></b>                                          |       |

|                                                                                                                                                                                        |         |
|----------------------------------------------------------------------------------------------------------------------------------------------------------------------------------------|---------|
| Fong-Mei Lu, Kevin W. Eliceiri, Jayne M. Squirrell, John G. White, and James Stewart .....                                                                                             | 64–73   |
| <b>A Kinesthetic Model Demonstrating Molecular Interactions Involved in Anterior-Posterior Pattern Formation in <i>Drosophila</i></b>                                                  |         |
| Kristin R. Douglas .....                                                                                                                                                               | 74–81   |
| <b>Alternation of Generations and Experimental Design: A Guided-Inquiry Lab Exploring the Nature of the <i>her1</i> Developmental Mutant of <i>Ceratopteris richardii</i> (C-Fern)</b> |         |
| Mark D. Spiro and Karin I. Knisely .....                                                                                                                                               | 82–88   |
| <b>Other Articles</b>                                                                                                                                                                  |         |
| <b>Integrating PCR Theory and Bioinformatics into a Research-oriented Primer Design Exercise</b>                                                                                       |         |
| Amber L. Robertson and Allison R. Phillips .....                                                                                                                                       | 89–95   |
| <b>Aligning Goals, Assessments, and Activities: An Approach to Teaching PCR and Gel Electrophoresis</b>                                                                                |         |
| Allison R. Phillips, Amber L. Robertson, Janet Batzli, Michelle Harris, and Sarah Miller .....                                                                                         | 96–106  |
| <b>A Western Blot-based Investigation of the Yeast Secretory Pathway Designed for an Intermediate-Level Undergraduate Cell Biology Laboratory</b>                                      |         |
| Jennifer K. Hood-DeGrenier .....                                                                                                                                                       | 107–117 |
| <b>Development of a Cross-Disciplinary Investigative Model for the Introduction of Microarray Techniques at Non-R1 Undergraduate Institutions</b>                                      |         |
| David E. Walker, Gary P. Lutz, and Consuelo J. Alvarez .....                                                                                                                           | 118–131 |
| <b>Experimenting with Spirituality: Analyzing <i>The God Gene</i> in a Nonmajors Laboratory Course</b>                                                                                 |         |
| Linda A. Silveira .....                                                                                                                                                                | 132–145 |
| <b>Using Clickers in Nonmajors- and Majors-Level Biology Courses: Student Opinion, Learning, and Long-Term Retention of Course Material</b>                                            |         |
| Kirsten Crossgrove and Kristen L. Curran .....                                                                                                                                         | 146–154 |
| <b>Bioinformatics in High School Biology Curricula: A Study of State Science Standards</b>                                                                                             |         |
| Stephen H. Wefer and Keith Sheppard .....                                                                                                                                              | 155–162 |

*On the Cover*

Different aspects of sea urchin development from images available at Jeff Hardin's Dynamics of Development website (<http://worms.zoology.wisc.edu/dd2/>). See the article by Stark in this issue (pp. 5–9) for more information. (Top) Nomarski microscopy montage of early development in *L. variegatus*, from fertilized egg (upper left) to blastula (lower right). (Bottom left) *L. variegatus* embryo immunostained for the Snail protein (red) and a skeletogenic mesenchyme-specific antigen (green). (Bottom right) A *L. variegatus* pluteus larva (Nomarski microscopy).
